# Supplementary material for: Electrochemical production of H 2 O 2 on palladium-based clusters driven by metal–support interaction
Source: Royal Society of Chemistry journal article supplement (doi:10.1039/d5ta05763a), 2025-01-01
Supplement: d5ta05763a1.pdf [file d5ta05763a1.pdf]

## Supplementary Information

### Electrochemical production of H<sub>2</sub>O<sub>2</sub> on palladium-based clusters driven by metal-support interaction

Prabhu Bharathan,<sup>a</sup> Can Li,<sup>b</sup> Bo Zhao,<sup>c</sup> Anna Dennett,<sup>a</sup> Lihua Zhang<sup>\*,d</sup> and Jiye Fang<sup>\*,a,b</sup>

<sup>a</sup>Materials Science and Engineering Program, State University of New York at Binghamton, Binghamton, New York 13902, United States.

<sup>b</sup>Department of Chemistry, State University of New York at Binghamton, Binghamton, New York 13902, United States.

<sup>c</sup>College of Arts & Sciences Microscopy, Texas Tech University, Lubbock, Texas 79409, United States.

<sup>d</sup>Center for Functional Nanomaterials, Brookhaven National Laboratory, Upton, New York 11973, United States.

#### Contents

1. Supplementary Figures
2. Supplementary Tables
3. References

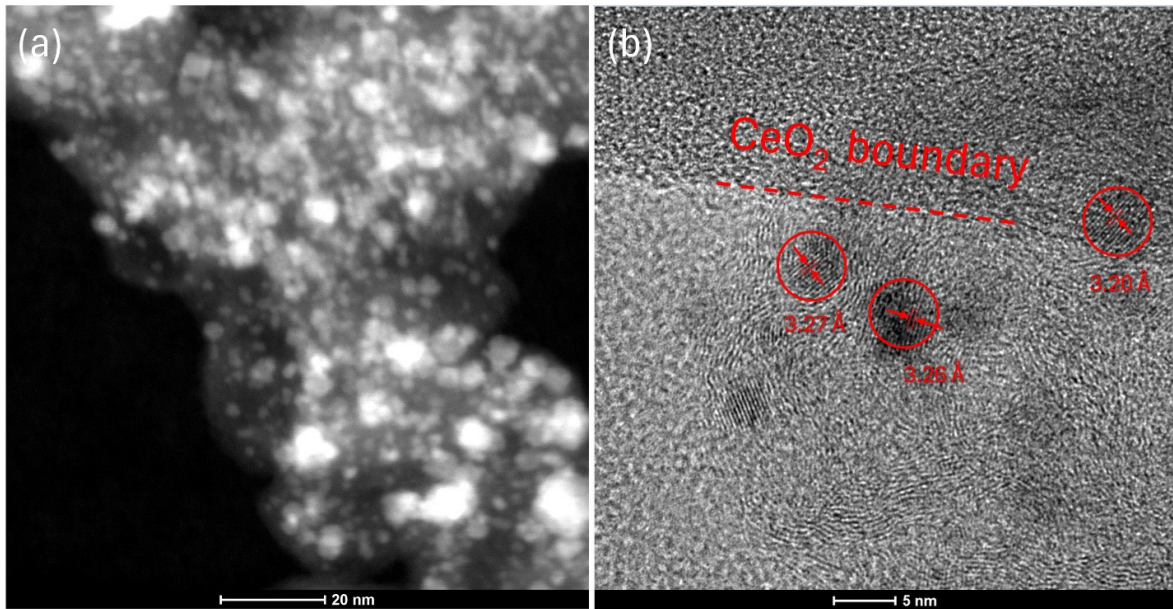

**Figure S1.** Electron microscopic images of the Pd<sub>1.53</sub>-CeO<sub>2</sub>/C sample. (a), HAADF-STEM image, showing the low-magnification Pd-component and CeO<sub>2</sub> nanocrystal distribution on the carbon support; (b), HRTEM image, where red circles highlight PdO NCs with the measured *d*-spacings of their lattice planes.

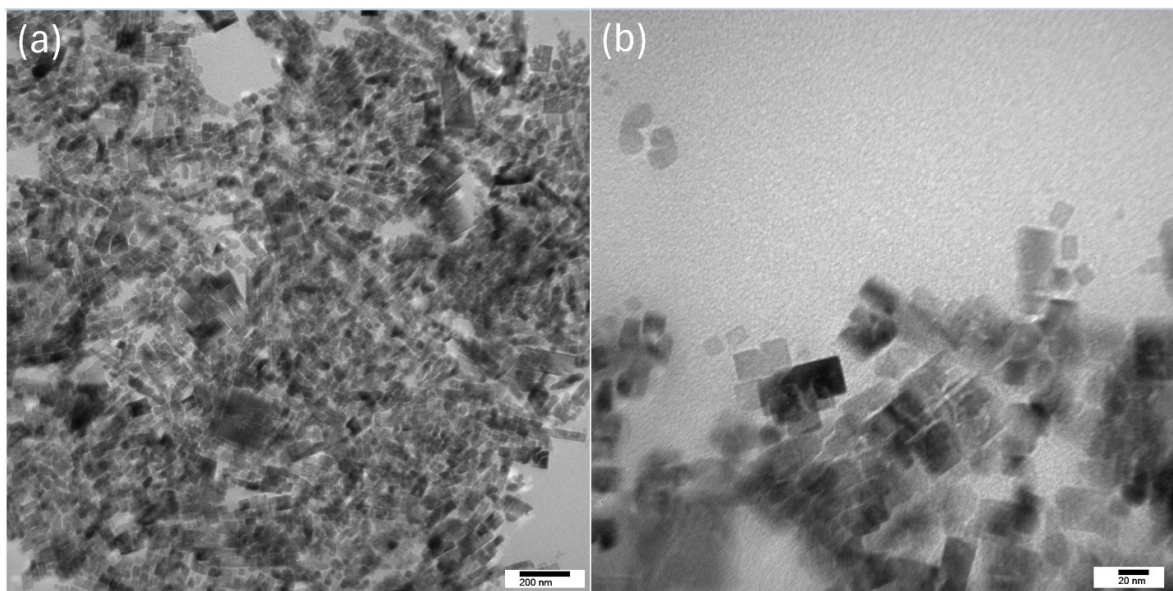

**Figure S2.** TEM images of individual CeO<sub>2</sub> substrates without Pd element and carbon, synthesized using the same procedure.

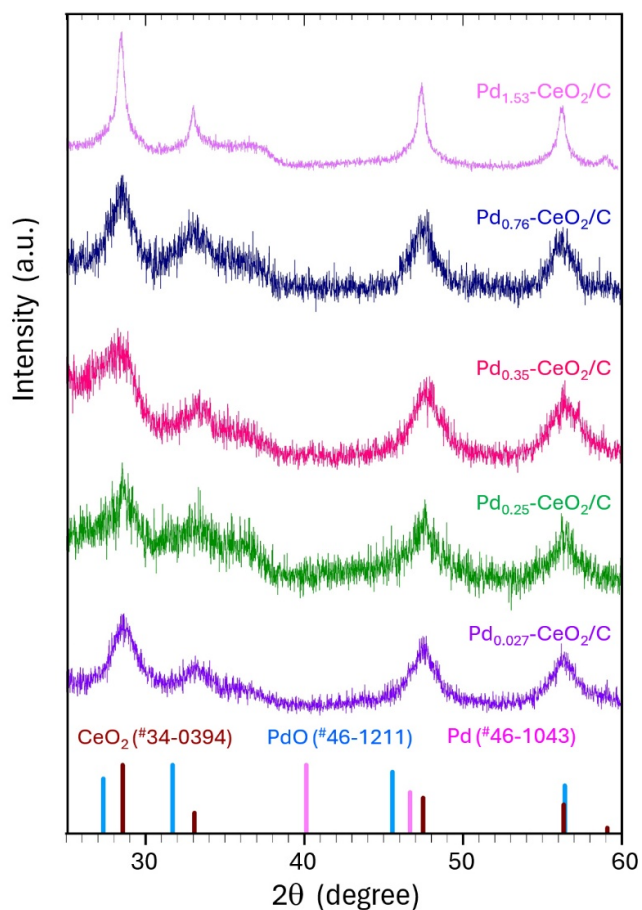

**Figure S3.** XRD patterns of Pd<sub>x</sub>-CeO<sub>2</sub>/C composites ( $x = 0.027, 0.25, 0.35, 0.76, 1.53$ ). The vertical lines indicate the standard diffraction pattern of CeO<sub>2</sub> (ICDD PDF card 34-0394), PdO (ICDD PDF card 46-1211), and Pd (ICDD PDF card 46-1043).

**Table S1.** Pd Loadings of the input set and actual loadings determined by ICP-OES analysis

| Set Pd loading (wt %) as mass fraction of CeO <sub>2</sub> | Set Pd loading (wt %) in the total mass of the catalyst sample | Actual Pd loading (wt %) in the total mass of the catalyst sample |
|------------------------------------------------------------|----------------------------------------------------------------|-------------------------------------------------------------------|
| 0.05                                                       | 0.03                                                           | 0.027                                                             |
| 0.5                                                        | 0.3                                                            | 0.25                                                              |
| 1                                                          | 0.6                                                            | 0.35                                                              |
| 2                                                          | 1.18                                                           | 0.76                                                              |
| 4                                                          | 2.34                                                           | 1.53                                                              |

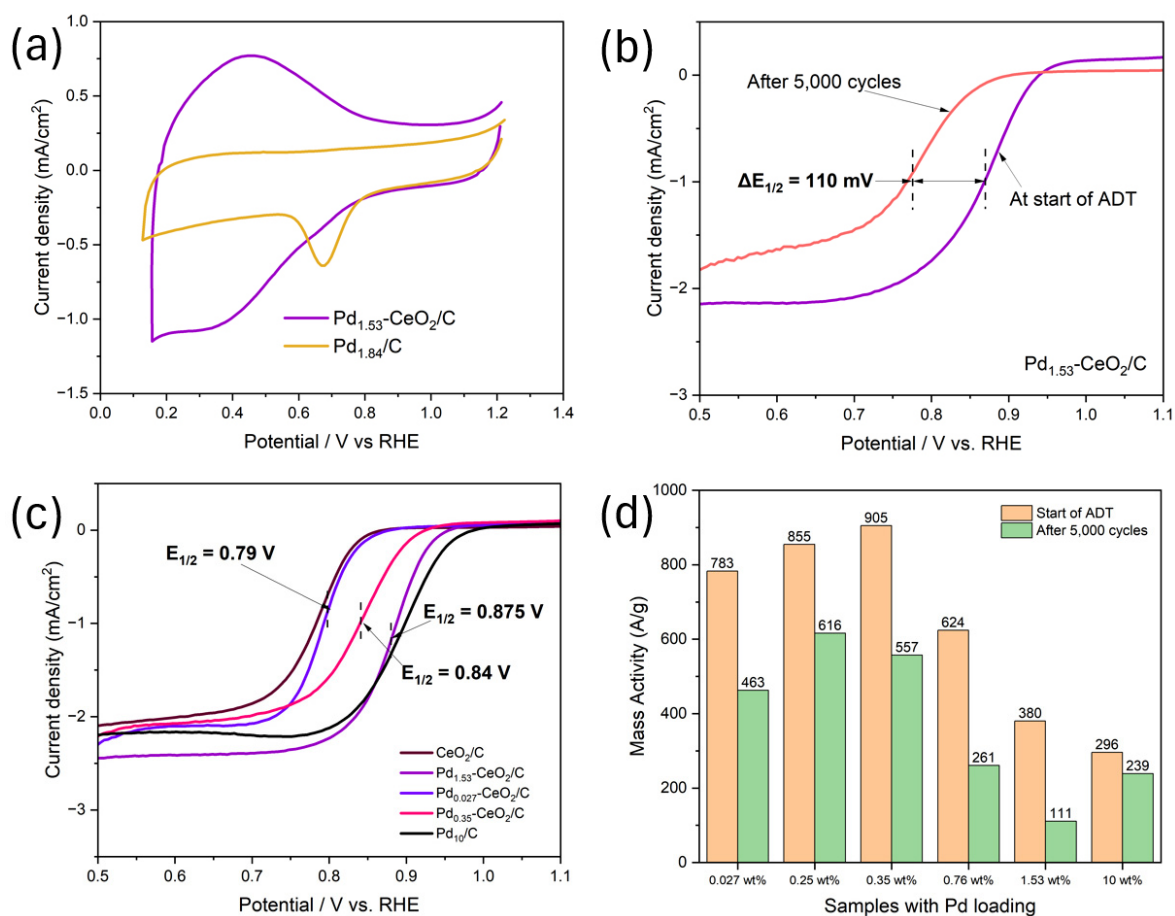

**Figure S4.** Electrochemical characterizations of Pd<sub>x</sub>-CeO<sub>2</sub>/C. (a), Cyclic voltammetry of Pd<sub>1.53</sub>-CeO<sub>2</sub>/C and Pd<sub>1.84</sub>/C in N<sub>2</sub>-saturated 1 M KOH solution at a scan rate of 50 mV/s and step size of 10 mV after 50 potential cycles; (b), ORR polarization curves of Pd<sub>1.53</sub>-CeO<sub>2</sub>/C measured at a rotation speed of 1,600 rpm in 1 M KOH solution at the beginning of ADT and after 5,000 potential cycles; (c), ORR polarization curves of pristine CeO<sub>2</sub>/C, benchmark Pd<sub>10</sub>/C, Pd<sub>x</sub>/C, and some Pd<sub>x</sub>-CeO<sub>2</sub>/C samples measured at a rotation speed of 1,600 rpm in 1 M KOH solution, showing their  $\Delta E_{1/2}$ ; and (d), calculated ORR mass activities of various Pd<sub>x</sub>-CeO<sub>2</sub>/C and benchmark Pd<sub>10</sub>/C at the beginning of ADT and after 5,000 potential cycles.

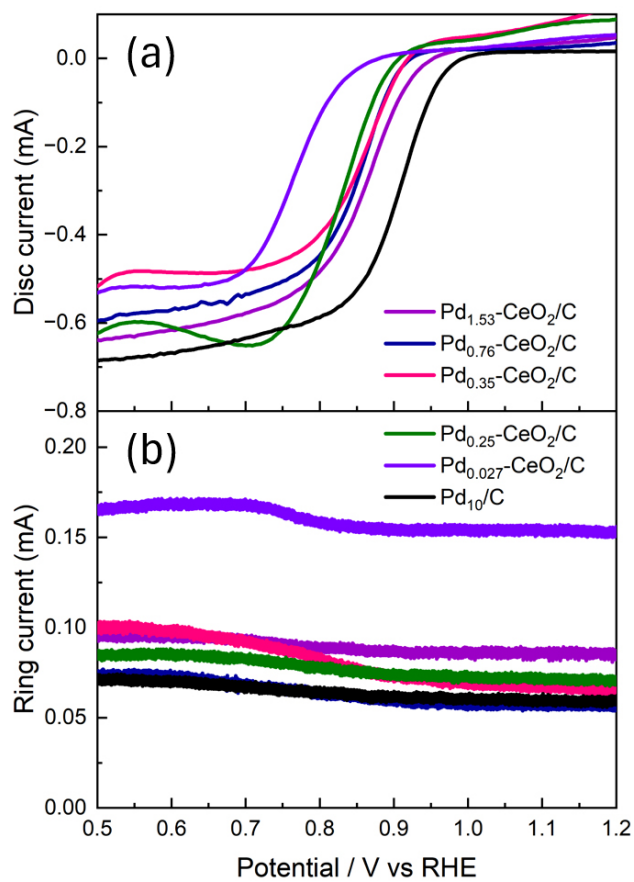

**Figure S5.** ORR polarization disc and ring currents of Pd<sub>x</sub>-CeO<sub>2</sub>/C and Pd<sub>10</sub>/C determined in 1 M KOH at a rotation speed of 1,600 rpm using an RRDE system. (a), Disc current; (b) ring current.

**Table S2:** H<sub>2</sub>O<sub>2</sub> production yield and molar rate estimated from the ring current by assuming a two-electron transfer pathway at a disc potential of 0.7 V vs. RHE

| Catalysts                            | H <sub>2</sub> O <sub>2</sub> production yield |             | H <sub>2</sub> O <sub>2</sub> molar production rate  |                                                            |
|--------------------------------------|------------------------------------------------|-------------|------------------------------------------------------|------------------------------------------------------------|
|                                      | selectivity                                    | <i>FE</i> * | (mol g <sub>Pd</sub> <sup>-1</sup> h <sup>-1</sup> ) | (mol g <sub>catalyst</sub> <sup>-1</sup> h <sup>-1</sup> ) |
| Pd <sub>x</sub> -CeO <sub>2</sub> /C |                                                |             |                                                      |                                                            |
| <i>x</i> = 0.027                     | 97.0%                                          | 94.2%       | 195.8                                                | 0.27                                                       |
| <i>x</i> = 0.25                      | 51.0%                                          | 34.2%       | 100.8                                                | 0.14                                                       |
| <i>x</i> = 0.35                      | 68.2%                                          | 51.7%       | 112.0                                                | 0.15                                                       |
| <i>x</i> = 0.76                      | 50.7%                                          | 34.0%       | 82.1                                                 | 0.11                                                       |
| <i>x</i> = 1.53                      | 60.0%                                          | 42.8%       | 111.7                                                | 0.15                                                       |
| Pd <sub>10</sub> /C                  | 44.9%                                          | 28.9%       | 83.0                                                 | 0.11                                                       |

\* *FE*: Faradaic efficiency.

**Table S3:** Comparison of H<sub>2</sub>O<sub>2</sub> production performance across various metal-based electrocatalysts\*

| Catalyst                           | Structure or Size        | Electrolyte | Mass activity                                                    | H <sub>2</sub> O <sub>2</sub> yield                                          | Ref. |
|------------------------------------|--------------------------|-------------|------------------------------------------------------------------|------------------------------------------------------------------------------|------|
| Ni-O-C nanosheets                  | atomic-level dispersion  | 1 M KOH     | -                                                                | 93% - 98% (selectivity)<br>@ 0.3 - 0.9 V (RHE)                               | 1    |
| Al-O-C<br>Ga-O-C<br>Cr-O-C         | atomic-level dispersion  | 0.1 M NaOH  | 23.9 (A/g-catalyst)<br>12.3 (A/g-catalyst)<br>6.1 (A/g-catalyst) | 97% (selectivity)<br>89% (selectivity)<br>81% (selectivity)<br>@ 0.7 V (RHE) | 2    |
| Pd-CNT<br>Fe-CNT                   | atomic-level dispersion  | 0.1 M KOH   | -<br>100 (A/g-catalyst)<br>@ ~0.77 V (RHE)                       | ~87% (selectivity)<br>~ 75 - 90% (selectivity)<br>@ 0.4 - 0.75 V (RHE)       | 3    |
| Co-POC-O                           | 20 nm                    | 0.1 M KOH   | ~12 (A/g-catalyst)<br>@ 0.7 V (RHE)                              | ~84% (selectivity)<br>@ 0.7 V (RHE)                                          | 4    |
| Co-N-C                             | > 50 nm                  | 0.1 M KOH   | -                                                                | ~80% (selectivity)<br>@ 0.1 V (RHE)                                          | 5    |
| oxidized CNT                       | -                        | 0.1 M KOH   | ~12.5 (A/g-catalyst)<br>@ 0.7 V (RHE)                            | ~90 % (selectivity)<br>@ 0.4 - 0.7 V (RHE)                                   | 6    |
| F-mrGO                             | > 1 μm                   | 0.1 M KOH   | 100 (A/g-catalyst)<br>@ 0.62 V (RHE)                             | ~100% (selectivity)<br>@ ~0.63 - 0.68 V (RHE)                                | 7    |
| Au-Pt-Ni NR                        | ~50 nm                   | 0.1 M KOH   | 31.7 (A/g-catalyst)<br>192.9 (A/g-Pt)                            | 88 - 95% (selectivity)<br>@ 0.1 - 0.6 V (RHE)                                | 8    |
| Pd/MnO <sub>2</sub> -CNT<br>Pd/CNT | atomic-level dispersion  | 0.1 M KOH   | ~484 A/g @ 0.9 V (RHE)                                           | -<br>~25.3% (selectivity)<br>@ 0.3 - 0.7 V (RHE)                             | 9    |
| In SAs/NSBC                        | atomic-level dispersion  | 0.1 M KOH   | -                                                                | 95.4% (selectivity)<br>@ 0.66 V (RHE)                                        | 10   |
| COF-366-Co                         | atomic-level dispersion  | 0.1 M KOH   | -                                                                | 91% (selectivity)<br>@ 0.2 V (RHE)                                           | 11   |
| Co <sub>1</sub> @GO                | chemical dispersion      | 0.1 M KOH   | -                                                                | 81.4 % (selectivity)<br>@ 0.6 V (RHE)                                        | 12   |
| Co-N-C                             | atomic-level dispersion  | 0.1 M KOH   | ~67 A/g @ 0.75 V (RHE)                                           | ~80% (selectivity)<br>@ 0.6 V (RHE)                                          | 13   |
| Co-F-CNT                           | atomic-level dispersion  | 1 M KOH     | -                                                                | 80% (selectivity)<br>@ 0.2 – 0.8 V (RHE)                                     | 14   |
| CoPc-OCNT                          | metal single-site on CNT | 1 M KOH     | -                                                                | 96-98% (FE)<br>@ 100 – 200 mA/cm <sup>2</sup>                                | 15   |
| N-C                                | 2D structure             | 1 M KOH     | -                                                                | 90% (FE)<br>@ 0.55 – 0.65 V (RHE)                                            | 16   |
| N-FLG-8                            | 2D structure             | 1 M KOH     | -                                                                | 99% (FE) @ 1.8 V furfural oxidation in flow cell                             | 17   |

|                                          |          |                       |                                |                                    |              |
|------------------------------------------|----------|-----------------------|--------------------------------|------------------------------------|--------------|
| Printex 6L C                             | --       | 1 M KOH               |                                | ~60% (CE) @<br>-1.1 V (Ag/AgCl)    | 18           |
| RuO <sub>x</sub> /TNR                    | nanorods | 1 M KOH<br>in cathode |                                | ~90% (FE)<br>@ 0.4 – 0.8 V (RHE)   | 19           |
| Pd <sub>0.027</sub> -CeO <sub>2</sub> /C | clusters | 1 M KOH               | 783 (A/g-Pd)<br>@ 0.85 V (RHE) | 97.0% (94.2%, FE)<br>@ 0.7 V (RHE) | this<br>work |

\* Co-POC-O: Co-N<sub>x</sub>-C site and oxygen functional group co-modified carbon-based catalyst; F-mrGO: few-layered mildly reduced graphene oxide; CNT: carbon nanotube; NR: nano-rods; In SAs/NSBC: In atoms are anchored by combined N, S-dual first coordination and B second coordination supported by the hollow carbon rods; COF-366-Co: Co-centered conjugated porphyrin-based covalent organic framework coordination 2D polymer; Co<sub>1</sub>@GO: Co single cobalt atoms anchored on oxygen functionalized graphene oxide; Co-F-CNT: Co single-atom sites with secondary fluorene heterodopants on carbon nanotubes; CoPc-OCNT: cobalt phthalocyanine molecule anchored on oxygen-modified carbon plane; FE: Faradaic efficiency; N-FLG-8: nitrogen-rich few-layered graphene (mass ratio between melamine and glycine: 8); N-C: modified nitrogen-doped carbon; RuO<sub>x</sub>/TNR: ruthenium catalyst-decorated TiO<sub>2</sub> nanorods; Printex 6L C: unmodified Printex 6L carbon-based gas diffusion electrode (GDE); CE: current efficiency.

**Table S4.** Mass activity (MA) loss of Pd<sub>x</sub>-CeO<sub>2</sub>/C and Pd<sub>10</sub>/C after 5,000 potential cycles

| Catalyst                             | Loss of MA at $E_{1/2} = 0.85$ V |
|--------------------------------------|----------------------------------|
| Pd <sub>x</sub> -CeO <sub>2</sub> /C |                                  |
| $x = 0.027$                          | 40.9%                            |
| $x = 0.25$                           | 28.0%                            |
| $x = 0.35$                           | 38.5%                            |
| $x = 0.76$                           | 58.2%                            |
| $x = 1.53$                           | 70.8%                            |
| Pd <sub>10</sub> /C                  | 19.3%                            |

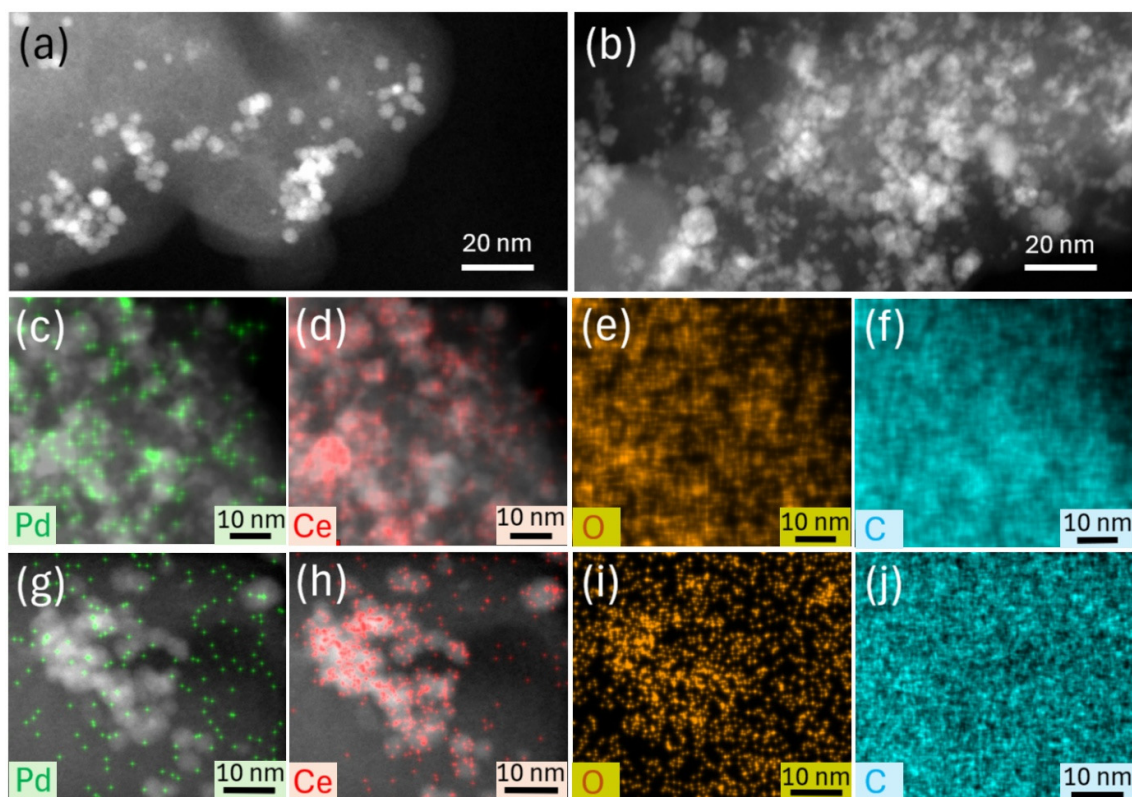

**Figure S6.** HAADF-STEM images and EDX elemental maps (Pd, Ce, O, and C) of Pd<sub>0.76</sub>-CeO<sub>2</sub>/C and Pd<sub>1.53</sub>-CeO<sub>2</sub>/C catalysts after 5,000-cycle ADT. (a) and (b), HAADF-STEM images of Pd<sub>0.76</sub>-CeO<sub>2</sub>/C and Pd<sub>1.53</sub>-CeO<sub>2</sub>/C after ADT, respectively; (c) – (f), EDX elemental maps of Pd<sub>1.53</sub>-CeO<sub>2</sub>/C; (g) – (j), EDX elemental maps of Pd<sub>0.76</sub>-CeO<sub>2</sub>/C. HAADF-STEM images are used as the background for Pd- and Ce-EDX maps.

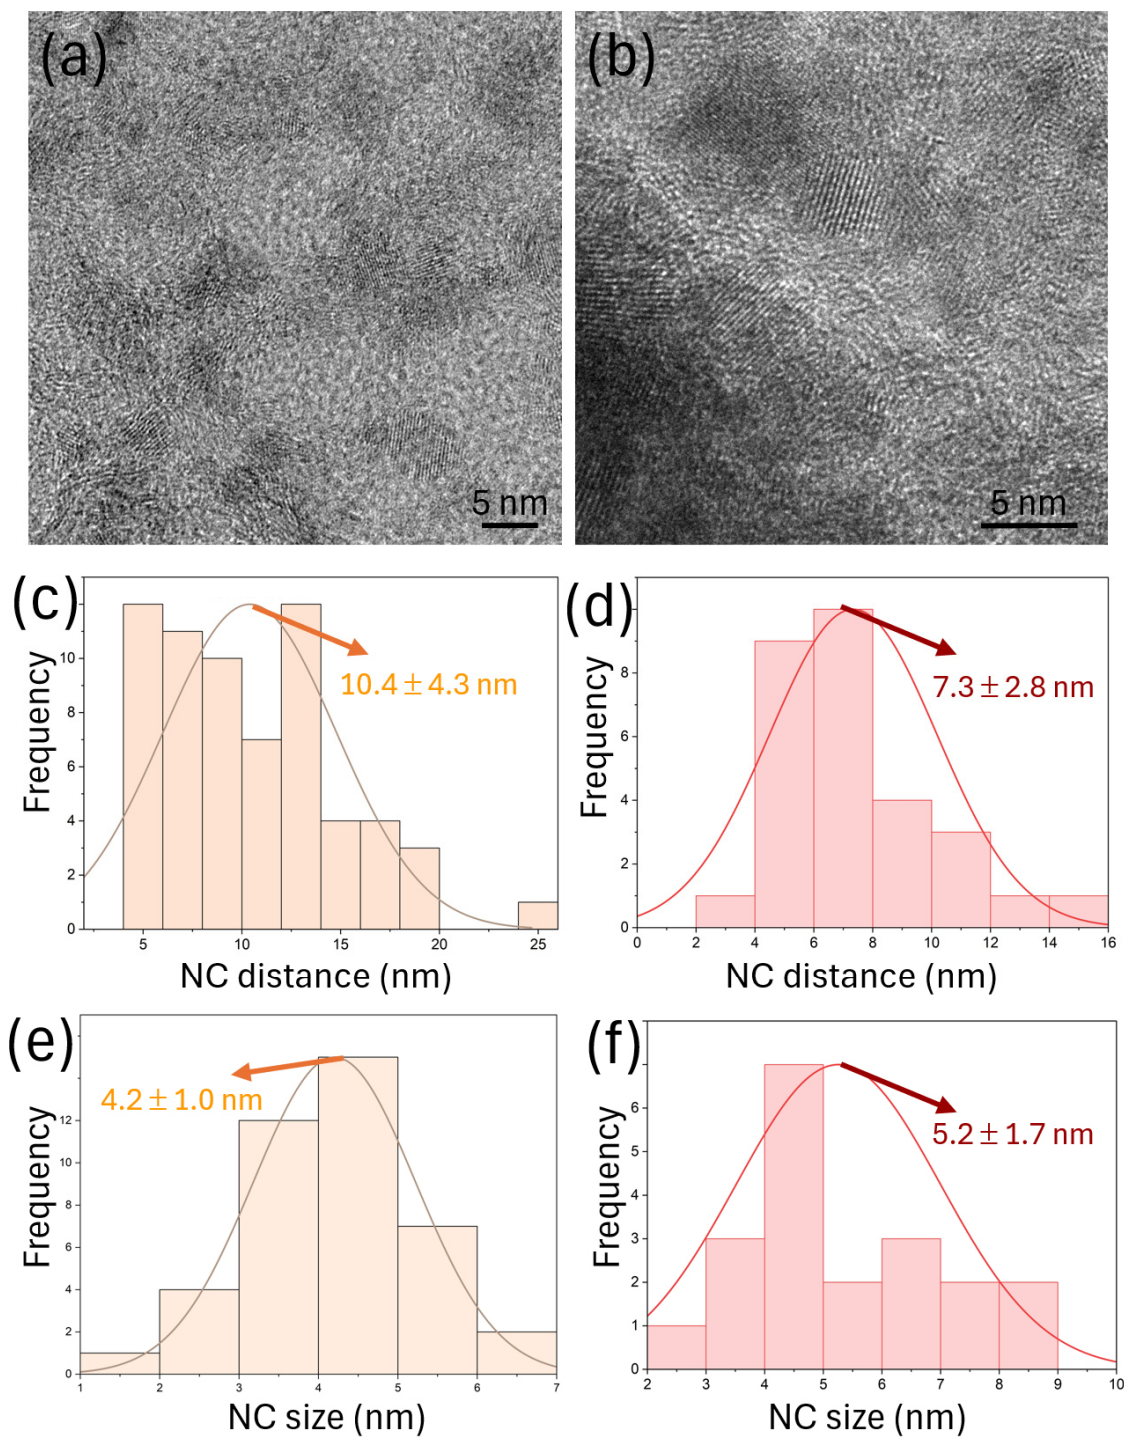

**Figure S7.** HRTEM images and corresponding data analysis of Pd<sub>1.53</sub>-CeO<sub>2</sub>/C before (a, c, e) and after ADT (b, d, f). (a) and (b), HRTEM images of the catalyst before and after 5,000-cycle ADT, respectively; (c) and (d), histograms of nearest-neighbor distances between PdO NCs; (e) and (f), size distribution of PdO NCs.

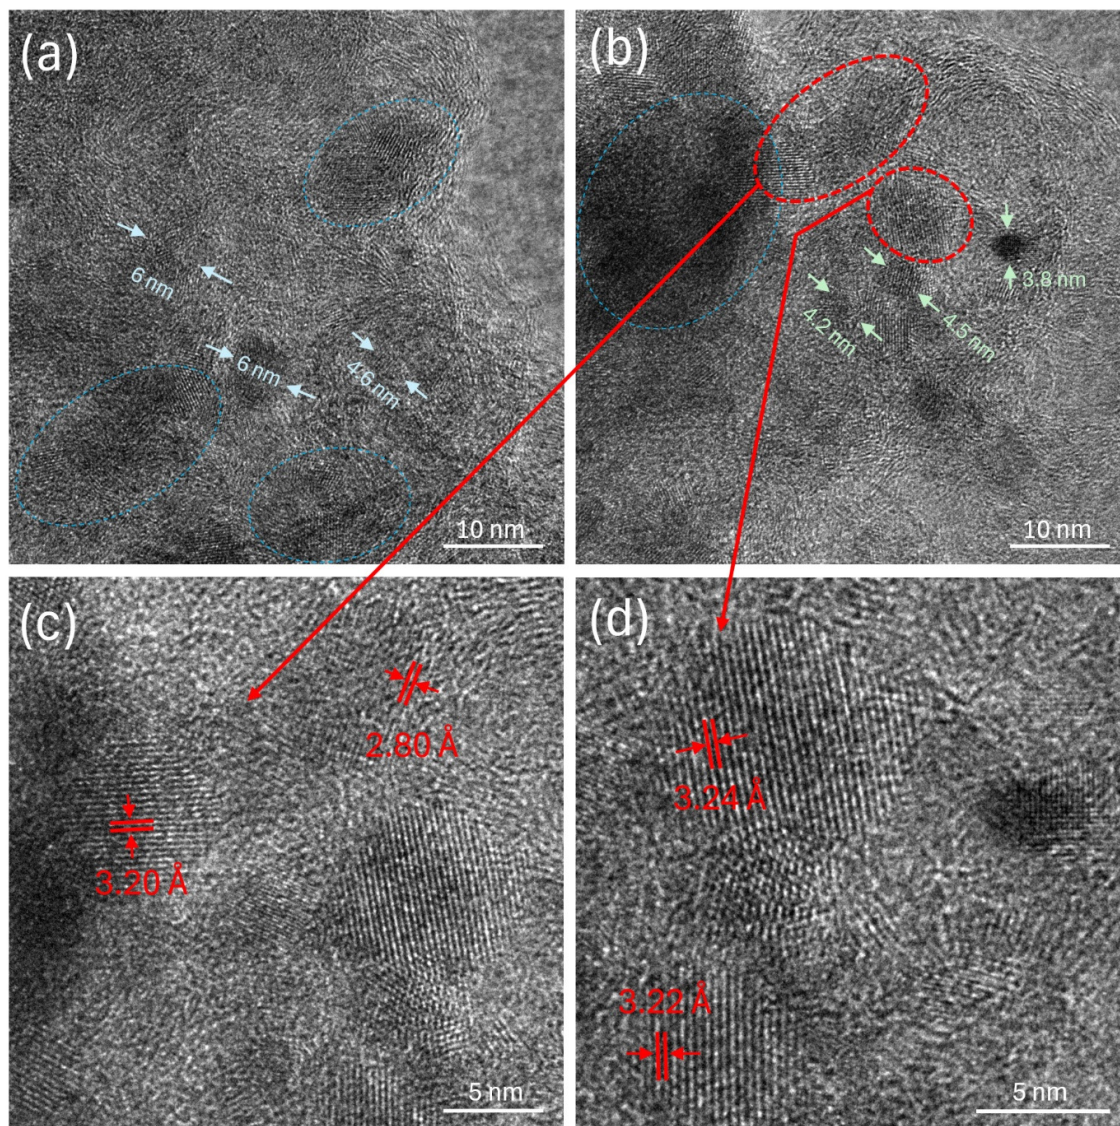

**Figure S8.** HRTEM images of Pd<sub>1.53</sub>-CeO<sub>2</sub>/C after 5,000-cycle ADT, taken from selected regions containing PdO NC agglomerations (highlighted with blue circles). (a) and (b), Size estimation of individual PdO NCs, illustrating that more severe agglomeration is associated with smaller surrounding satellite NCs; (c) and (d), magnified views of selected individual PdO NCs from panel (b), highlighted by red circles, showing the measured lattice spacings corresponding to specific crystallographic planes.

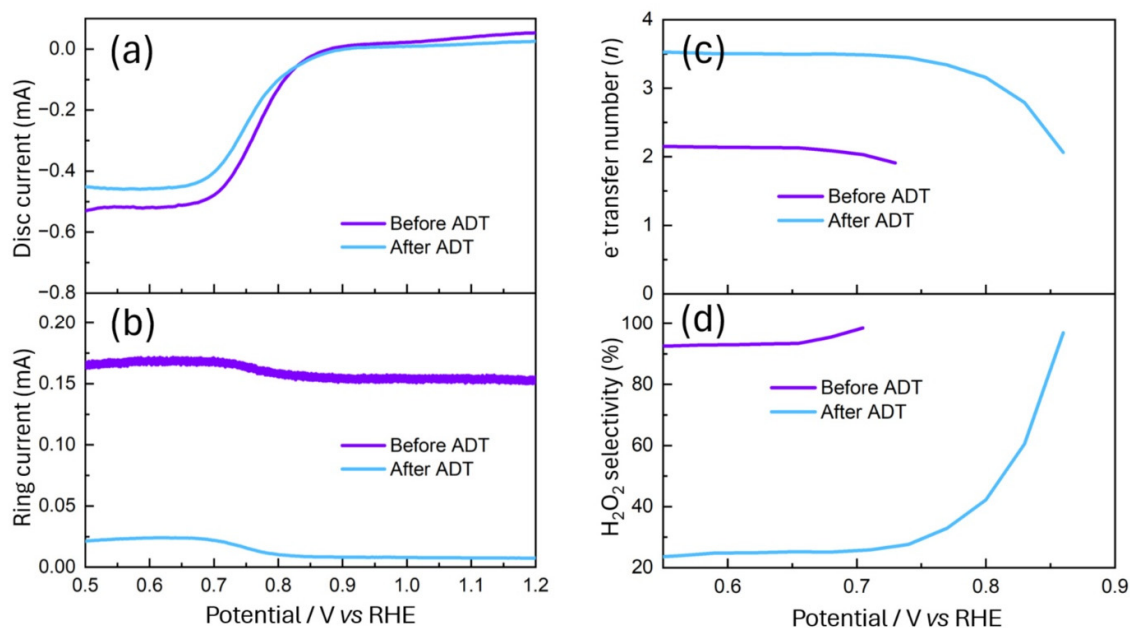

**Figure S9.** RRDE measurements of Pd<sub>0.027</sub>-CeO<sub>2</sub>/C before and after accelerated durability test (5,000 potential cycles) in 1 M KOH at a rotation speed of 1,600 rpm. (a) and (b), polarization disc current and ring current, respectively; (c) and (d), electron transfer numbers and H<sub>2</sub>O<sub>2</sub> selectivity, respectively.

**Table S5:** Comparison of H<sub>2</sub>O<sub>2</sub> yield on Pd<sub>0.027</sub>-CeO<sub>2</sub>/C before and after the accelerated durability test (5,000 potential cycles) conducted in 1 M KOH at a rotation speed of 1,600 rpm.

|                                                                                                          | Initial |       | After ADT |       |
|----------------------------------------------------------------------------------------------------------|---------|-------|-----------|-------|
|                                                                                                          | 0.6 V   | 0.7 V | 0.6 V     | 0.7 V |
| potential (RHE)                                                                                          | 0.6 V   | 0.7 V | 0.6 V     | 0.7 V |
| Selectivity                                                                                              | 93.2%   | 97.0% | 23.9%     | 25.8% |
| <i>FE</i> *                                                                                              | 87.3%   | 94.2% | 13.6%     | 14.8% |
| H <sub>2</sub> O <sub>2</sub> molar production rate (mol g <sub>Pd</sub> <sup>-1</sup> h <sup>-1</sup> ) | 205.6   | 195.8 | 43.9      | 39.5  |
| (mol g <sub>catalyst</sub> <sup>-1</sup> h <sup>-1</sup> )                                               | 0.28    | 0.27  | 0.04      | 0.04  |

\* *FE*: Faradaic efficiency.

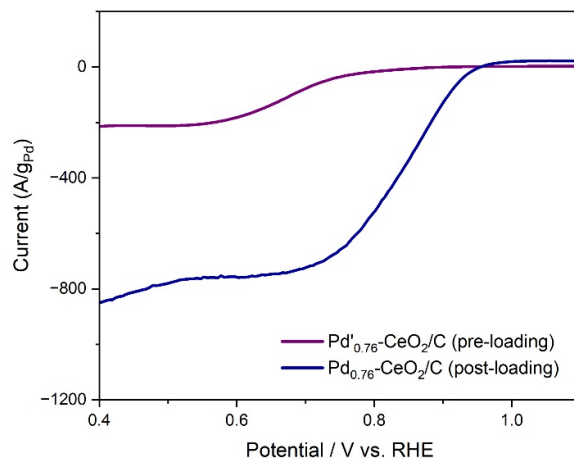

**Figure S10.** Comparison of ORR polarization curves of sample Pd<sub>0.76</sub>-CeO<sub>2</sub>/C and Pd'<sub>0.76</sub>-CeO<sub>2</sub>/C generated from the “pre-loading” method.

#### References:

1. W. Xu, Z. Liang, S. Gong, B. Zhang, H. Wang, L. Su, X. Chen, N. Han, Z. Tian, T. Kallio, L. Chen, Z. Lu and X. Sun, *ACS Sustainable Chem. Eng.*, 2021, **9**, 7120-7129.
2. Q. Yang, W. Xu, S. Gong, G. Zheng, Z. Tian, Y. Wen, L. Peng, L. Zhang, Z. Lu and L. Chen, *Nat. Commun.*, 2020, **11**, 5478.
3. K. Jiang, S. Back, A. J. Akey, C. Xia, Y. Hu, W. Liang, D. Schaak, E. Stavitski, J. K. Nørskov, S. Siahrostami and H. Wang, *Nat. Commun.*, 2019, **10**, 3997.
4. B.-Q. Li, C.-X. Zhao, J.-N. Liu and Q. Zhang, *Adv. Mater.*, 2019, **31**, 1808173.
5. Y. Sun, L. Silvioli, N. R. Sahraie, W. Ju, J. Li, A. Zitolo, S. Li, A. Bagger, L. Arnarson, X. Wang, T. Moeller, D. Bernsmeier, J. Rossmeisl, F. Jaouen and P. Strasser, *J. Am. Chem. Soc.*, 2019, **141**, 12372-12381.
6. Z. Lu, G. Chen, S. Siahrostami, Z. Chen, K. Liu, J. Xie, L. Liao, T. Wu, D. Lin, Y. Liu, T. F. Jaramillo, J. K. Nørskov and Y. Cui, *Nat. Catal.*, 2018, **1**, 156-162.
7. H. W. Kim, M. B. Ross, N. Kornienko, L. Zhang, J. Guo, P. Yang and B. D. McCloskey, *Nat. Catal.*, 2018, **1**, 282-290.
8. Z. Zheng, Y. H. Ng, D.-W. Wang and R. Amal, *Adv. Mater.*, 2016, **28**, 9949-9955.
9. W. Xiang, Y. Zhao, Z. Jiang, X. Li, H. Zhang, Y. Sun, Z. Ning, F. Du, P. Gao, J. Qian, K. Kato, M. Yamauchi and Y. Sun, *J. Mater. Chem. A*, 2018, **6**, 23366-23377.
10. E. Zhang, L. Tao, J. An, J. Zhang, L. Meng, X. Zheng, Y. Wang, N. Li, S. Du, J. Zhang, D. Wang and Y. Li, *Angew. Chem. Int. Ed.*, 2022, **61**, e202117347.
11. C. Liu, H. Li, F. Liu, J. Chen, Z. Yu, Z. Yuan, C. Wang, H. Zheng, G. Henkelman, L. Wei and Y. Chen, *J. Am. Chem. Soc.*, 2020, **142**, 21861-21871.

12. B.-W. Zhang, T. Zheng, Y.-X. Wang, Y. Du, S.-Q. Chu, Z. Xia, R. Amal, S.-X. Dou and L. Dai, *Commun. Chem.*, 2022, **5**, 43.
13. E. Jung, H. Shin, B.-H. Lee, V. Efremov, S. Lee, H. S. Lee, J. Kim, W. Hooch Antink, S. Park, K.-S. Lee, S.-P. Cho, J. S. Yoo, Y.-E. Sung and T. Hyeon, *Nat. Mater.*, 2020, **19**, 436-442.
14. Y. Tian, R. Chen, X. Liu, L. Yin, D. a. Yang, F. Hou and J. Liang, *EcoMat*, 2023, **5**, e12336.
15. P. Cao, X. Quan, X. Nie, K. Zhao, Y. Liu, S. Chen, H. Yu and J. G. Chen, *Nat. Commun.*, 2023, **14**, 172.
16. B. Sabri Rawah, M. Albloushi and W. Li, *Chem. Eng. J.*, 2023, **466**, 143282.
17. L. Li, C. Tang, Y. Zheng, B. Xia, X. Zhou, H. Xu and S.-Z. Qiao, *Adv. Energy Mater.*, 2020, **10**, 2000789.
18. W. R. P. Barros, T. Ereno, A. C. Tavares and M. R. V. Lanza, *ChemElectroChem*, 2015, **2**, 714-719.
19. T. H. Jeon, B. Kim, C. Kim, C. Xia, H. Wang, P. J. J. Alvarez and W. Choi, *Energy Environ. Sci.*, 2021, **14**, 3110-3119.
